# Supplementary material
Source: publisher figshare collection journal article supplement (https://sage.figshare.com/ndownloader/files/14670821)
Supplement: Supplementary file 1 [file 14670821]

# Veterinary Pathology: Supplemental Materials.

## Brown et al. Chronic renal changes after a single ischemic event in an experimental model of feline chronic kidney disease.

Supplemental Table S1.

Weekly body weight (kg) in cats following 90 minutes of unilateral renal ischemia (day 0).

| Week              | 1.00 | 2.00 | 3.00 | 4.00 | 5.00 | 6.00 | 7.00 | 8.00 | 9.00 | 10.00 | 11.00 | 12.00 | 13.00 | 14.00 | 15.00 | 16.00 | 17.00 | 18.00 | 19.00 | 20.00 | 21.00 | 22.00 | 23.00 | 24.00 | 25.00 |  |
|-------------------|------|------|------|------|------|------|------|------|------|-------|-------|-------|-------|-------|-------|-------|-------|-------|-------|-------|-------|-------|-------|-------|-------|--|
| <b>Cat Number</b> |      |      |      |      |      |      |      |      |      |       |       |       |       |       |       |       |       |       |       |       |       |       |       |       |       |  |
| 1                 | 3.08 | 2.95 | 3.35 | 3.60 | 3.52 | 3.62 | 3.62 | 3.68 | 3.93 | 4.02  | 4.00  | 4.12  | 3.64  | 4.11  | 4.33  | 4.31  | 4.46  | 4.68  | 4.69  | 4.90  | 4.98  | 4.98  | 4.95  | 4.94  | 5.15  |  |
| 2                 | 2.95 | 2.76 | 2.95 | 3.11 | 3.14 | 3.12 | 3.14 | 3.46 | 3.62 | 3.68  | 3.71  | 3.76  | 3.68  | 3.71  | 3.72  | 3.77  | 3.76  | 3.86  | 3.91  | 4.01  | 4.05  | 3.90  | 3.96  | 3.90  | 3.94  |  |
| 3                 | 4.12 | 4.00 | 4.07 | 4.16 | 4.19 | 4.24 | 4.31 | 4.42 | 4.81 | 4.46  | 4.59  | 4.48  | 5.02  | 4.93  | 5.03  | 5.04  | 5.05  | 5.23  | 5.20  | 5.05  | 5.11  | 5.12  | 5.14  | 5.26  | 5.05  |  |
| 4                 | 2.58 | 2.50 | 2.64 | 2.90 | 2.94 | 3.11 | 3.24 | 3.24 | 3.48 | 3.61  | 3.63  | 3.61  | 3.74  | 3.69  | 3.87  | 3.82  | 3.94  | 4.16  | 4.22  | 4.46  | 4.39  | 4.23  | 4.20  | 4.19  | 4.33  |  |
| 5                 | 3.24 | 3.11 | 3.43 | 3.72 | 3.98 | 4.04 | 4.11 | 4.47 | 4.69 | 4.80  | 4.89  | 4.96  | 4.93  | 4.92  | 4.98  | 5.00  | 5.14  | 5.15  | 5.03  | 4.91  | 5.21  | 5.32  | 4.33  | 5.21  | 5.30  |  |
| 6                 | 2.87 | 2.65 | 2.84 | 2.90 | 2.94 | 3.05 | 3.09 | 3.30 | 3.39 | 3.44  | 3.41  | 3.43  | 3.59  | 3.60  | 3.68  | 3.73  | 3.77  | 3.84  | 3.79  | 3.84  | 3.81  | 3.97  | 3.98  | 3.96  | 4.00  |  |

Supplemental Table S2.

Serum urea nitrogen and creatinine concentration and Urine specific gravity in six cats following

| <b>Serum Urea Nitrogen (mg/dL)</b>            |       |       |       |       |       |       |       |       |       |       |
|-----------------------------------------------|-------|-------|-------|-------|-------|-------|-------|-------|-------|-------|
| Study Day                                     | -5    | 1     | 3     | 7     | 30    | 60    | 90    | 120   | 150   | 180   |
| <b>Cat Number</b>                             |       |       |       |       |       |       |       |       |       |       |
| 1                                             | 21    | 41    | 32    | 31    | 28    | 27    | 28    | 27    | 30    | 27    |
| 2                                             | 23    | 23    | 19    | 34    | 29    | 29    | 26    | 23    | 30    | 22    |
| 3                                             | 25    | *     | 23    | 24    | 31    | 31    | 40    | 24    | 23    | 24    |
| 4                                             | 29    | 32    | 26    | 27    | 29    | 29    | 30    | 29    | 26    | 27    |
| 5                                             | 23    | 26    | 24    | 31    | 32    | 29    | 29    | 25    | 24    | 23    |
| 6                                             | 30    | 28    | 31    | 25    | 34    | 35    | 37    | 28    | 28    | 25    |
| <b>Serum Creatinine Concentration (mg/dL)</b> |       |       |       |       |       |       |       |       |       |       |
| Study Day                                     | -5    | 1     | 3     | 7     | 30    | 60    | 90    | 120   | 150   | 180   |
| <b>Cat Number</b>                             |       |       |       |       |       |       |       |       |       |       |
| 1                                             | 1.2   | 1.3   | 1.2   | 1.2   | 1.1   | 1.3   | 1.3   | 1.4   | 1.3   | 1.6   |
| 2                                             | 1.1   | 1.3   | 1.3   | 1.2   | 1.2   | 1.4   | 1.2   | 1.6   | 1.5   | 1.5   |
| 3                                             | 1     | 1.6   | 1.3   | 1.5   | 1.2   | 1.2   | 1.7   | 1.4   | 1.5   | 1.4   |
| 4                                             | 1.1   | 1.1   | 1.3   | 1.2   | 1.1   | 1.2   | 1.3   | 1.5   | n/d   | 1.6   |
| 5                                             | 1.2   | 1.5   | 1.5   | 1.4   | 1.2   | 1.3   | 1.4   | 1.6   | 1.5   | 1.7   |
| 6                                             | 0.9   | 1.1   | 1.1   | 1.2   | 1.1   | 1.1   | 1.2   | 1.4   | n/d   | 1.4   |
| <b>Urine specific gravity</b>                 |       |       |       |       |       |       |       |       |       |       |
| Study Day                                     | -5    | 1     | 3     | 7     | 30    | 60    | 90    | 120   | 150   | 180   |
| <b>Cat Number</b>                             |       |       |       |       |       |       |       |       |       |       |
| 1                                             | 1.052 | 1.065 | 1.049 | 1.048 | 1.055 | 1.060 | 1.060 | 1.060 | 1.062 | 1.034 |
| 2                                             | 1.052 | 1.046 | 1.063 | 1.060 | 1.041 | 1.055 | 1.055 | 1.058 | 1.058 | 1.060 |
| 3                                             | 1.046 | 1.037 | 1.053 | 1.049 | 1.046 | 1.052 | 1.052 | 1.060 | 1.065 | 1.058 |
| 4                                             | 1.048 | 1.048 | 1.050 | 1.054 | 1.058 | 1.058 | 1.062 | 1.065 | 1.065 | 1.052 |
| 5                                             | 1.047 | 1.040 | 1.045 | 1.053 | 1.052 | 1.060 | 1.060 | 1.055 | 1.060 | 1.060 |
| 6                                             | 1.046 | 1.065 | 1.057 | 1.057 | 1.055 | 1.055 | 1.055 | 1.062 | 1.055 | 1.055 |

90 minutes of unilateral renal ischemia (day 0)

Veterinary Pathology: Supplemental Materials.  
Brown et al. Chronic renal changes after a single ischemic event  
in an experimental model of feline chronic kidney disease.

Supplemental Table S3.

Glomerular filtration rate (ml/kg/min) as estimated by iohexol clearance in six cats that underwent 90 minutes of unilateral renal ischemia (day 0)

| Study Day         | 0     | 93    | % change from baseline | 183   | % change from baseline |
|-------------------|-------|-------|------------------------|-------|------------------------|
| <b>Cat Number</b> |       |       |                        |       |                        |
| 1                 | 5.214 | 3.067 | -2.147                 | 2.472 | -2.742                 |
| 2                 | 2.493 | 2.815 | 0.322                  | 2.522 | 0.029                  |
| 3                 | 3.954 | 3.088 | -0.866                 | 2.357 | -1.597                 |
| 4                 | 3.881 | 3.209 | -0.672                 | 3.778 | -0.103                 |
| 5                 | 3.63  | 3.359 | -0.271                 | 2.278 | -1.352                 |
| 6                 | 3.642 | 1.534 | -2.108                 | 2.344 | -1.298                 |

Supplemental Table S4.

Urine protein: creatinine in six cats following 90 minutes of unilateral renal ischemia (day 0)

| Study Day         | -5   | 90   | 180  |
|-------------------|------|------|------|
| <b>Cat Number</b> |      |      |      |
| 1                 | 0.11 | 0.10 | 0.10 |
| 2                 | 0.10 | 0.18 | 0.11 |
| 3                 | 0.17 | 0.13 | 0.09 |
| 4                 | 0.16 | 0.14 | 0.10 |
| 5                 | 0.08 | 0.06 | 0.05 |
| 6                 | 0.22 | 0.16 | 0.10 |

Veterinary Pathology: Supplemental Materials.  
Brown et al. Chronic renal changes after a single ischemic event  
in an experimental model of feline chronic kidney disease.

Supplemental Table S5.

Doppler blood pressure measurement in awake cats following 90 minutes of unilateral renal ischemia (day 0). Data represents the average of three measurements.

| Study Day  | -5  | 7   | 30  | 60  | 90  | 120 | 150 | 180 |
|------------|-----|-----|-----|-----|-----|-----|-----|-----|
| Cat number |     |     |     |     |     |     |     |     |
| 1          | 180 | 165 | 135 | 123 | 155 | 138 | 139 | 145 |
| 2          | 162 | 218 | 180 | 192 | 210 | 190 | 177 | 191 |
| 3          | 139 | 158 | 160 | 175 | 300 | 142 | 141 | 191 |
| 4          | 162 | 184 | 160 | 169 | 235 | 110 | 139 | 225 |
| 5          | 162 | 166 | 200 | 152 | 138 | 165 | 100 | 121 |
| 6          | 165 | 173 | 159 | 188 | 188 | 160 | 179 | 229 |

Supplemental Table S6.

Kidney weight (g) and kidney volume (cm<sup>3</sup>) in cats 6 months after 90 minutes of right sided renal ischemia

| Kidney weight (g)                |                  |                      |
|----------------------------------|------------------|----------------------|
| Cat Number                       | right (Ischemic) | left (contralateral) |
| 1                                | 14.00            | 13.00                |
| 2                                | 10.00            | 13.00                |
| 3                                | 13.00            | 19.00                |
| 4                                | 10.00            | 15.00                |
| 5                                | 14.00            | 13.00                |
| 6                                | 3.00             | 18.00                |
| Kidney Volume (cm <sup>3</sup> ) |                  |                      |
| Cat Number                       |                  |                      |
| 1                                | 19.45            | 19.00                |
| 2                                | 11.19            | 20.35                |
| 3                                | 19.80            | 26.60                |
| 4                                | 13.06            | 19.68                |
| 5                                | 17.00            | 20.00                |
| 6                                | 4.50             | 36.43                |

# Veterinary Pathology: Supplemental Materials.

## Brown et al. Chronic renal changes after a single ischemic event in an experimental model of feline chronic kidney disease.

Supplemental Table S7. Percent of pixels staining positive for Picrosirius red staining (out of 1,920,000 total pixels) in the cortex (c), corticomedullary junction (CMJ), and medulla (m) in 10 20X fields. For each cat and each section of the kidney, the 10 fields were averaged for comparison.

|                    | C1     | C2     | C3     | C4     | C5     | C6     | C7     | C8     | C9     | C10    | Average | CMJ1   | CMJ2   | CMJ3   | CMJ4   | CMJ5   | CMJ6   | CMJ7   | CMJ8   | CMJ9   | CMJ10  | Average | M1     | M2     | M3     | M4     | M5     | M6     | M7     | M8     | M9     | M10    | Average |
|--------------------|--------|--------|--------|--------|--------|--------|--------|--------|--------|--------|---------|--------|--------|--------|--------|--------|--------|--------|--------|--------|--------|---------|--------|--------|--------|--------|--------|--------|--------|--------|--------|--------|---------|
| <b>Cat 1 Left</b>  | 1.99%  | 1.43%  | 2.22%  | 1.85%  | 1.37%  | 1.89%  | 2.62%  | 1.42%  | 1.41%  | 1.64%  | 1.78%   | 2.41%  | 2.60%  | 3.19%  | 1.92%  | 1.94%  | 1.28%  | 0.55%  | 8.30%  | 4.37%  | 1.77%  | 2.83%   | 1.89%  | 1.89%  | 2.66%  | 2.62%  | 5.41%  | 1.98%  | 2.38%  | 2.89%  | 3.04%  | 4.52%  | 2.93%   |
| <b>Cat 1 Right</b> | 3.21%  | 1.81%  | 3.60%  | 3.56%  | 2.89%  | 2.37%  | 3.88%  | 2.25%  | 3.62%  | 2.72%  | 2.99%   | 3.18%  | 5.55%  | 1.76%  | 2.21%  | 3.94%  | 4.09%  | 1.08%  | 6.38%  | 4.34%  | 2.79%  | 3.53%   | 11.84% | 7.77%  | 10.35% | 15.73% | 9.23%  | 14.02% | 10.55% | 10.51% | 4.30%  | 8.43%  | 10.27%  |
| <b>Cat 2 Left</b>  | 2.26%  | 3.55%  | 2.38%  | 2.83%  | 2.20%  | 2.63%  | 3.22%  | 2.56%  | 4.14%  | 2.43%  | 2.82%   | 0.94%  | 2.49%  | 2.33%  | 1.00%  | 2.15%  | 0.89%  | 3.18%  | 2.35%  | 0.89%  | 1.69%  | 1.79%   | 6.14%  | 4.99%  | 8.47%  | 8.92%  | 5.21%  | 3.52%  | 1.87%  | 1.87%  | 3.21%  | 1.75%  | 4.60%   |
| <b>Cat 2 Right</b> | 8.92%  | 5.39%  | 5.47%  | 2.77%  | 7.35%  | 5.86%  | 6.83%  | 7.16%  | 9.22%  | 17.38% | 7.64%   | 6.35%  | 7.79%  | 5.21%  | 4.84%  | 3.16%  | 2.53%  | 8.91%  | 7.47%  | 3.23%  | 3.36%  | 5.28%   | 7.55%  | 12.06% | 12.50% | 7.10%  | 9.63%  | 7.91%  | 10.50% | 10.97% | 9.84%  | 14.50% | 10.26%  |
| <b>Cat 3 Left</b>  | 0.63%  | 1.60%  | 2.02%  | 1.82%  | 2.26%  | 1.91%  | 2.16%  | 2.06%  | 3.17%  | 2.38%  | 2.00%   | 4.62%  | 3.93%  | 3.68%  | 7.78%  | 7.45%  | 2.94%  | 3.30%  | 1.46%  | 2.30%  | 3.31%  | 4.08%   | 6.80%  | 2.32%  | 4.27%  | 1.61%  | 6.16%  | 4.44%  | 2.42%  | 1.96%  | 4.91%  | 7.85%  | 4.28%   |
| <b>Cat 3 Right</b> | 8.05%  | 3.74%  | 5.63%  | 6.73%  | 2.31%  | 6.46%  | 11.58% | 4.82%  | 13.87% | 1.95%  | 6.51%   | 13.14% | 10.24% | 13.28% | 10.41% | 9.16%  | 10.40% | 9.08%  | 6.88%  | 2.58%  | 2.33%  | 8.75%   | 11.60% | 13.16% | 11.74% | 13.82% | 11.90% | 9.85%  | 3.02%  | 15.04% | 9.34%  | 8.94%  | 10.84%  |
| <b>Cat 4 Left</b>  | 2.08%  | 2.82%  | 2.17%  | 1.76%  | 1.27%  | 1.74%  | 2.03%  | 2.31%  | 2.24%  | 2.23%  | 2.07%   | 12.96% | 10.75% | 7.22%  | 5.95%  | 6.78%  | 10.37% | 9.56%  | 3.29%  | 7.30%  | 8.91%  | 8.31%   | 9.62%  | 11.00% | 12.06% | 16.25% | 16.97% | 15.56% | 24.12% | 16.60% | 15.74% | 14.42% | 15.23%  |
| <b>Cat 4 Right</b> | 3.20%  | 4.12%  | 3.11%  | 1.65%  | 1.34%  | 2.78%  | 1.07%  | 3.48%  | 2.64%  | 2.58%  | 2.60%   | 10.77% | 6.27%  | 4.97%  | 7.73%  | 6.71%  | 7.48%  | 14.80% | 8.66%  | 10.66% | 9.87%  | 8.79%   | 13.56% | 7.87%  | 5.58%  | 5.88%  | 5.90%  | 8.76%  | 6.41%  | 9.15%  | 9.45%  | 9.25%  | 8.18%   |
| <b>Cat 5 Left</b>  | 0.46%  | 0.61%  | 1.49%  | 1.43%  | 1.62%  | 1.02%  | 0.88%  | 1.31%  | 0.90%  | 1.49%  | 1.12%   | 2.94%  | 0.68%  | 1.22%  | 1.03%  | 0.90%  | 0.93%  | 1.27%  | 1.53%  | 1.78%  | 1.98%  | 1.43%   | 7.40%  | 8.39%  | 6.18%  | 4.94%  | 2.76%  | 2.05%  | 7.75%  | 6.85%  | 2.66%  | 2.10%  | 5.11%   |
| <b>Cat 5 Right</b> | 4.50%  | 4.92%  | 2.98%  | 2.33%  | 5.14%  | 4.78%  | 2.45%  | 3.41%  | 2.17%  | 6.39%  | 3.91%   | 6.71%  | 4.49%  | 8.19%  | 3.96%  | 5.39%  | 3.37%  | 1.92%  | 1.64%  | 0.96%  | 3.24%  | 3.99%   | 4.40%  | 4.69%  | 2.09%  | 2.93%  | 2.42%  | 0.97%  | 7.04%  | 2.96%  | 2.32%  | 1.74%  | 3.16%   |
| <b>Cat 6 Left</b>  | 2.01%  | 1.54%  | 2.17%  | 1.50%  | 1.57%  | 2.27%  | 1.34%  | 1.86%  | 2.17%  | 1.15%  | 1.76%   | 2.15%  | 4.30%  | 4.02%  | 2.65%  | 4.69%  | 3.06%  | 2.41%  | 2.30%  | 3.45%  | 3.63%  | 3.27%   | 8.62%  | 9.55%  | 8.94%  | 10.72% | 12.69% | 13.74% | 15.56% | 14.25% | 15.91% | 20.44% | 13.04%  |
| <b>Cat 6 Right</b> | 17.62% | 20.78% | 20.78% | 35.74% | 23.97% | 23.94% | 29.55% | 20.65% | 26.28% | 21.95% | 24.13%  | 11.31% | 12.40% | 12.06% | 12.33% | 13.71% | 13.74% | 15.42% | 15.71% | 14.42% | 17.55% | 13.86%  | 15.14% | 15.26% | 14.27% | 14.19% | 13.11% | 11.79% | 9.80%  | 13.01% | 15.02% | 15.19% | 13.68%  |

Supplemental Table S8. Percent of pixels staining positive for smooth muscle actin stain (out of 1,920,000 total pixels) in the cortex (c), corticomedullary junction (CMJ), and medulla (m) in 10 20X fields. For each cat and each section of the kidney, the 10 fields were averaged for comparison.

|                    | C1    | C2    | C3    | C4    | C5    | C6    | C7    | C8    | C9    | C10   | Average | CMJ1  | CMJ2  | CMJ3  | CMJ4  | CMJ5  | CMJ6  | CMJ7  | CMJ8  | CMJ9  | CMJ10 | Average | M1    | M2    | M3    | M4    | M5    | M6    | M7    | M8    | M9    | M10   | Average |
|--------------------|-------|-------|-------|-------|-------|-------|-------|-------|-------|-------|---------|-------|-------|-------|-------|-------|-------|-------|-------|-------|-------|---------|-------|-------|-------|-------|-------|-------|-------|-------|-------|-------|---------|
| <b>Cat 1 Left</b>  | 1.40% | 1.16% | 1.42% | 1.09% | 1.56% | 2.01% | 1.14% | 1.20% | 1.14% | 1.83% | 1.39%   | 1.70% | 1.89% | 1.91% | 1.33% | 2.20% | 0.96% | 2.20% | 1.46% | 1.20% | 1.48% | 1.63%   | 3.22% | 3.10% | 2.47% | 1.78% | 1.67% | 1.34% | 1.36% | 1.26% | 2.04% | 1.51% | 1.98%   |
| <b>Cat 1 Right</b> | 2.08% | 1.27% | 0.83% | 1.32% | 1.15% | 1.80% | 1.80% | 0.62% | 0.75% | 0.52% | 1.21%   | 0.37% | 0.54% | 1.31% | 3.31% | 0.86% | 2.96% | 1.38% | 1.57% | 2.48% | 2.97% | 1.78%   | 0.70% | 1.00% | 1.86% | 1.91% | 2.86% | 2.30% | 4.29% | 2.41% | 3.09% | 2.59% | 2.30%   |
| <b>Cat 2 Left</b>  | 0.74% | 0.86% | 1.51% | 1.64% | 1.16% | 2.10% | 1.47% | 1.04% | 0.86% | 0.91% | 1.23%   | 1.66% | 1.07% | 0.95% | 1.55% | 1.46% | 1.72% | 1.02% | 1.70% | 0.94% | 1.04% | 1.31%   | 2.57% | 2.40% | 3.00% | 2.83% | 2.33% | 2.80% | 3.72% | 3.04% | 3.06% | 3.98% | 2.97%   |
| <b>Cat 2 Right</b> | 1.03% | 2.20% | 2.49% | 1.73% | 1.65% | 0.79% | 1.39% | 3.73% | 1.09% | 1.72% | 1.78%   | 1.92% | 4.26% | 1.19% | 2.40% | 2.02% | 2.99% | 1.37% | 2.66% | 7.55% | 1.33% | 2.77%   | 2.32% | 3.33% | 3.42% | 3.36% | 3.64% | 2.84% | 2.72% | 3.41% | 2.03% | 2.44% | 2.95%   |
| <b>Cat 3 Left</b>  | 0.54% | 0.25% | 0.74% | 0.35% | 0.56% | 0.79% | 0.57% | 0.27% | 0.36% | 0.51% | 0.50%   | 1.53% | 3.00% | 2.87% | 2.04% | 1.62% | 2.16% | 1.60% | 0.80% | 2.58% | 1.60% | 1.98%   | 0.86% | 1.17% | 1.30% | 1.89% | 1.27% | 2.51% | 1.26% | 1.11% | 1.34% | 2.38% | 1.51%   |
| <b>Cat 3 Right</b> | 2.03% | 1.36% | 2.41% | 7.71% | 7.66% | 1.30% | 7.51% | 1.42% | 3.14% | 2.87% | 3.74%   | 2.70% | 5.22% | 4.50% | 6.28% | 9.31% | 4.58% | 2.16% | 5.01% | 4.45% | 5.63% | 4.98%   | 1.25% | 2.26% | 1.82% | 0.75% | 3.42% | 2.60% | 3.69% | 2.90% | 2.25% | 3.99% | 2.49%   |
| <b>Cat 4 Left</b>  | 1.61% | 1.66% | 1.46% | 1.66% | 1.37% | 1.23% | 1.65% | 1.24% | 1.71% | 1.72% | 1.53%   | 1.34% | 1.49% | 0.98% | 0.95% | 1.34% | 1.58% | 1.39% | 2.77% | 1.87% | 1.45% | 1.52%   | 1.14% | 1.11% | 1.37% | 1.31% | 1.36% | 1.65% | 1.31% | 1.94% | 1.31% | 1.27% | 1.38%   |
| <b>Cat 4 Right</b> | 1.87% | 1.60% | 0.96% | 1.78% | 1.44% | 1.48% | 2.09% | 1.96% | 1.79% | 2.03% | 1.70%   | 0.89% | 1.77% | 1.64% | 2.75% | 1.14% | 2.09% | 1.78% | 2.92% | 2.34% | 2.21% | 1.95%   | 1.26% | 1.04% | 1.13% | 1.81% | 1.76% | 1.89% | 1.50% | 4.33% | 2.45% | 0.93% | 1.81%   |
| <b>Cat 5 Left</b>  | 0.62% | 0.96% | 1.28% | 1.22% | 1.43% | 1.09% | 0.94% | 0.67% | 0.90% | 0.80% | 0.99%   | 1.90% | 1.76% | 2.25% | 2.26% | 1.89% | 2.08% | 2.07% | 1.70% | 2.60% | 2.42% | 2.09%   | 1.76% | 2.02% | 1.63% | 2.81% | 1.53% | 2.98% | 2.40% | 2.24% | 1.66% | 1.10% | 2.01%   |
| <b>Cat 5 Right</b> | 0.93% | 1.08% | 0.41% | 0.46% | 0.70% | 0.39% | 0.29% | 0.58% | 0.40% | 1.94% | 0.72%   | 3.05% | 5.04% | 5.03% | 2.51% | 2.95% | 3.70% | 5.23% | 3.78% | 2.42% | 4.79% | 3.85%   | 1.34% | 2.22% | 1.93% | 1.33% | 0.79% | 1.11% | 1.92% | 1.29% | 1.93% | 3.95% | 1.78%   |
| <b>Cat 6 Left</b>  | 1.18% | 1.51% | 0.67% | 0.97% | 1.01% | 0.80% | 0.61% | 0.59% | 0.76% | 0.67% | 0.88%   | 2.36% | 1.60% | 3.08% | 1.27% | 1.44% | 1.51% | 1.32% | 0.93% | 0.63% | 1.16% | 1.53%   | 1.28% | 1.27% | 3.04% | 1.56% | 2.02% | 1.36% | 2.18% | 3.19% | 2.83% | 1.89% | 2.06%   |
| <b>Cat 6 Right</b> | 1.10% | 0.39% | 0.33% | 0.11% | 0.29% | 2.50% | 2.06% | 1.16% | 0.91% | 2.59% | 1.15%   | 2.28% | 1.04% | 1.96% | 2.39% | 3.53% | 4.09% | 5.05% | 7.98% | 6.99% | 6.15% | 4.15%   | 1.85% | 1.85% | 3.77% | 3.43% | 2.36% | 1.84% | 3.90% | 4.05% | 3.97% | 4.31% | 3.13%   |
